# Supplementary material for: Rhythmic astrocytic GABA production synchronizes neuronal circadian timekeeping in the suprachiasmatic nucleus
Source: PubMed Central journal article supplement (PMC11731042; doi:10.1038/s44318-024-00324-w), 2024-12-02
Supplement: 44318_2024_324_MOESM1_ESM.pdf [file 44318_2024_324_MOESM1_ESM.pdf]

## Appendix for

# Rhythmic astrocytic GABA production synchronizes neuronal circadian timekeeping in the suprachiasmatic nucleus

Natalie Ness<sup>1,2</sup>, Sandra Díaz-Clavero<sup>1,2</sup>, Marieke MB Hoekstra<sup>1,2</sup> and Marco Brancaccio<sup>1,2\*</sup>

### Affiliations:

<sup>1</sup>Department of Brain Science, Imperial College London, United Kingdom

<sup>2</sup>UK Dementia Research Institute at Imperial College London, London, United Kingdom.

\*Corresponding author. Email: [m.brancaccio@imperial.ac.uk](mailto:m.brancaccio@imperial.ac.uk)

### Table of contents

|                       |        |
|-----------------------|--------|
| 1. Appendix Figure S1 | Page 2 |
| 2. Appendix Figure S2 | Page 3 |
| 3. Appendix Table S1  | Page 4 |

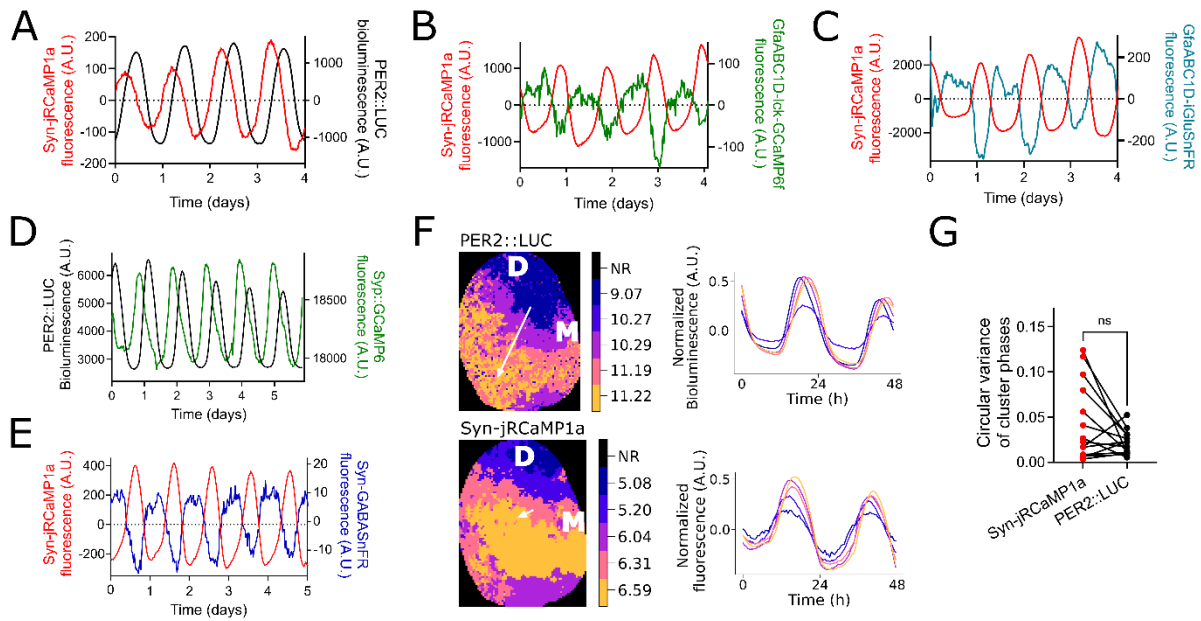

**Appendix Figure S1: Circadian oscillations of neuronal and astrocytic reporters in organotypic SCN slices and spatiotemporal phase waves of clock gene expression and neuronal calcium.** Representative traces showing circadian oscillations of genetically encoded reporters used in this manuscript: (A) Syn-jRCaMP1a and PER2::LUC, (B) Syn-jRCaMP1a and GfaABC1D-Ick-GCaMP6f, (C) Syn-jRCaMP1a and GfaABC1D-iGluSnFR, (D) PER2::LUC and Syn::GCaMP6s, (E) Syn-jRCaMP1a and Syn-GABASnFR. All reporters plotted within the same graph were monitored simultaneously within the same SCN. (F) Representative circadian phase map of PER2::LUC (top) and Syn-jRCaMP1a (bottom) in SCN slices, showing phase progression wave from the dorsomedial to ventrolateral SCN. One SCN is shown (top=dorsal-D, right=medial-M), showing dorsomedial to ventrolateral spatiotemporal progression of PER2::LUC expression and neuronal calcium levels. The white vector indicates the direction phase progression (see Methods). The color bar shows the circadian phase of each cluster, with corresponding time series of the clusters shown to the right. NR = non-rhythmic. (G) Inter-cluster phase dispersal, as measured by circular variance of phases, of co-detected PER2::LUC and Syn-jRCaMP1a. Each dot represents one SCN slice, N=14. Two-tailed paired t-test. ns=non-significant.

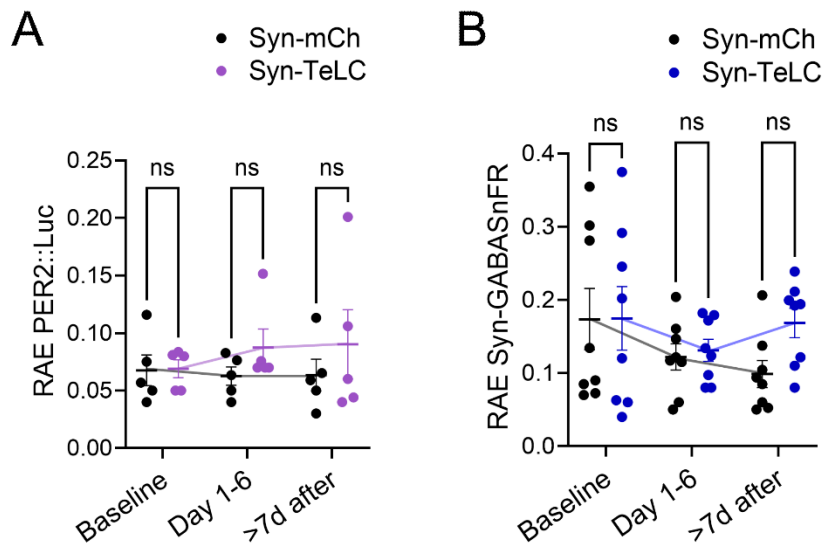

**Appendix Figure S2: Disrupting synaptic activity via genetic expression of tetanus toxin light chain does not significantly alter PER2::LUC or Syn-GABASnFR rhythm robustness.** Relative amplitude error (RAE) of rhythms of PER2::LUC (A) (N=5 per condition) and Syn-GABASnFR (B) (N=8 per condition) before and after transduction with Syn-TeLC or Syn-mCherry control. All data mean  $\pm$  SEM. Statistical test: two-way ANOVA with post-hoc Šidák's test, ns=non-significant.

**Appendix Table S1: Detailed statistical test results.**

| Figure                        | Statistical Test                                            | Mean difference (p-value) | Multiple comparisons                      | p-value |
|-------------------------------|-------------------------------------------------------------|---------------------------|-------------------------------------------|---------|
| 1D (left)                     | Paired two-tailed t-test                                    | 0.0105                    |                                           |         |
| 1D (right)                    | Kolmogorov-Smirnov test                                     | 0.0079                    |                                           |         |
| 1F (left)                     | Paired two-tailed t-test                                    | 0.0477                    |                                           |         |
| 1F (right)                    | Kolmogorov-Smirnov test                                     | 0.0025                    |                                           |         |
| 2A (left)                     | Mixed-effects model with Tukey's multiple comparison's test | 0.6388                    | PER2::Luc vs. Syn-jRCaMP1a                | 0.9984  |
|                               |                                                             |                           | PER2::Luc vs. Syn-GABASnFR                | 0.986   |
|                               |                                                             |                           | PER2::Luc vs. Syp::GCaMP6s                | 0.5739  |
|                               |                                                             |                           | Syn-jRCaMP1a vs. Syn-GABASnFR             | 0.9979  |
|                               |                                                             |                           | Syn-jRCaMP1a vs. Syp::GCaMP6s             | 0.6858  |
|                               |                                                             |                           | Syn-GABASnFR vs. Syp::GCaMP6s             | 0.7315  |
| 2A (right)                    | Mixed-effects model with Tukey's multiple comparison's test | 0.1679                    | PER2::Luc vs. Syn-jRCaMP1a                | 0.981   |
|                               |                                                             |                           | PER2::Luc vs. Syn-GABASnFR                | 0.3751  |
|                               |                                                             |                           | PER2::Luc vs. Syp::GCaMP6s                | 0.9668  |
|                               |                                                             |                           | Syn-jRCaMP1a vs. Syn-GABASnFR             | 0.1863  |
|                               |                                                             |                           | Syn-jRCaMP1a vs. Syp::GCaMP6s             | 0.9963  |
|                               |                                                             |                           | Syn-GABASnFR vs. Syp::GCaMP6s             | 0.5154  |
| 2E (top)                      | Paired two-tailed t-test                                    | 0.4801                    |                                           |         |
| 2E (bottom)                   | Paired two-tailed t-test                                    | 0.0079                    |                                           |         |
| 2F (top)                      | Kolmogorov-Smirnov test                                     | 0.357                     |                                           |         |
| 2F (bottom)                   | Kolmogorov-Smirnov test                                     | 0.00236                   |                                           |         |
| 2G                            | Mixed-effects model with Tukey's multiple comparison's test | <0.0001                   | Syn-jRCaMP1a vs. PER2::LUC                | 0.0539  |
|                               |                                                             |                           | Syn-jRCaMP1a vs. GfaABC1D-lck-GCaMP6f     | 0.001   |
|                               |                                                             |                           | Syn-jRCaMP1a vs. GfaABC1D-GluSnFr         | 0.0157  |
|                               |                                                             |                           | Syn-jRCaMP1a vs. Syp::GCaMP6s             | 0.841   |
|                               |                                                             |                           | Syn-jRCaMP1a vs. Syn-GABASnFR             | <0.0001 |
|                               |                                                             |                           | PER2::LUC vs. GfaABC1D-lck-GCaMP6f        | 0.2147  |
|                               |                                                             |                           | PER2::LUC vs. GfaABC1D-GluSnFr            | 0.5099  |
|                               |                                                             |                           | PER2::LUC vs. Syp::GCaMP6s                | 0.0937  |
|                               |                                                             |                           | PER2::LUC vs. Syn-GABASnFR                | 0.1862  |
|                               |                                                             |                           | GfaABC1D-lck-GCaMP6f vs. GfaABC1D-GluSnFr | >0.9999 |
|                               |                                                             |                           | GfaABC1D-lck-GCaMP6f vs. Syp::GCaMP6s     | 0.0035  |
|                               |                                                             |                           | GfaABC1D-lck-GCaMP6f vs. Syn-GABASnFR     | 0.9936  |
|                               |                                                             |                           | GfaABC1D-GluSnFr vs. Syp::GCaMP6s         | 0.0143  |
|                               |                                                             |                           | GfaABC1D-GluSnFr vs. Syn-GABASnFR         | 0.9997  |
| Syp::GCaMP6s vs. Syn-GABASnFR | 0.0029                                                      |                           |                                           |         |
| 2H                            | Rayleigh's test of uniformity                               |                           | PER2::LUC                                 | <0.0001 |
|                               |                                                             |                           | Syn-jRCaMP1a                              | <0.0001 |

| Figure      | Statistical Test                                     | Mean difference (p-value)                                | Multiple comparisons                 | p-value |
|-------------|------------------------------------------------------|----------------------------------------------------------|--------------------------------------|---------|
|             |                                                      |                                                          | Syp::GCaMP6s                         | 0.0151  |
|             |                                                      |                                                          | GfaABC1D-Ick-GCaMP6f                 | 0.753   |
|             |                                                      |                                                          | GfaABC1D-iGluSnFR                    | 0.763   |
|             |                                                      |                                                          | Syn-GABASnFR                         | 0.0870  |
| 3C          | Unpaired two-tailed t-test                           | 0.0008                                                   |                                      |         |
| 3E (left)   | Two-way ANOVA with Tukey's multiple comparisons test | Time 0.003<br>Treatment 0.0598<br>Interaction 0.023      | Day1-6: Syn-mCh vs Syn-TeLC          | 0.1746  |
|             |                                                      |                                                          | >7d after: Syn-mCh vs Syn-TeLC       | 0.0526  |
|             |                                                      |                                                          | Syn-mCh: BSL vs Day1-6               | 0.5774  |
|             |                                                      |                                                          | Syn-mCh: BSL vs >7d after            | 0.8346  |
|             |                                                      |                                                          | Syn-mCh: Day1-6 vs >7d after         | 0.7994  |
|             |                                                      |                                                          | Syn-TeLC: BSL vs Day1-6              | 0.0152  |
|             |                                                      |                                                          | Syn-TeLC: BSL vs >7d after           | 0.0002  |
|             |                                                      |                                                          | Syn-TeLC: Day1-6 vs >7d after        | 0.0682  |
| 3E (right)  | Two-way ANOVA with Tukey's multiple comparisons test | Time 0.0172<br>Treatment 0.5818<br>Interaction 0.2866    | Day1-6: Syn-mCh vs Syn-TeLC          | 0.8603  |
|             |                                                      |                                                          | >7d after: Syn-mCh vs Syn-TeLC       | 0.3319  |
|             |                                                      |                                                          | Syn-mCh: BSL vs Day1-6               | 0.7661  |
|             |                                                      |                                                          | Syn-mCh: BSL vs >7d after            | 0.042   |
|             |                                                      |                                                          | Syn-mCh: Day1-6 vs >7d after         | 0.0249  |
|             |                                                      |                                                          | Syn-TeLC: BSL vs Day1-6              | 0.6851  |
|             |                                                      |                                                          | Syn-TeLC: BSL vs >7d after           | 0.6185  |
|             |                                                      |                                                          | Syn-TeLC: Day1-6 vs >7d after        | 0.6302  |
| 3F (left)   | Two-way ANOVA with Šídák's multiple comparisons test | Time 0.7763<br>Treatment 0.5737<br>Interaction 0.8666    | Baseline                             | 0.9532  |
|             |                                                      |                                                          | Day 1-6                              | 0.9992  |
|             |                                                      |                                                          | >7d after                            | 0.8297  |
| 3F (right)  | Two-way ANOVA with Šídák's multiple comparisons test | Time 0.1174<br>Treatment 0.8601<br>Interaction 0.3657    | Baseline                             | 0.9922  |
|             |                                                      |                                                          | Day 1-6                              | 0.8653  |
|             |                                                      |                                                          | >7d after                            | 0.8062  |
| 3G          | Two-way ANOVA with Šídák's multiple comparisons test | Time <0.0001<br>Treatment 0.76064<br>Interaction 0.7245  | Baseline                             | 0.9896  |
|             |                                                      |                                                          | Day 1-6                              | 0.9904  |
|             |                                                      |                                                          | >7d after                            | 0.9178  |
| 3L (top)    | Unpaired two-tailed t-test                           | 0.0338                                                   |                                      |         |
| 3L (bottom) | Unpaired two-tailed t-test                           | 0.2589                                                   |                                      |         |
| 4F (left)   | Two-way ANOVA with Šídák's multiple comparisons test | Gene <0.0001<br>Cell type <0.0001<br>Interaction <0.0001 | Gad2 HY Astros vs. SCN Neurons       | <0.0001 |
|             |                                                      |                                                          | Gad2 HY Astros vs. HY GABA Neurons   | <0.0001 |
|             |                                                      |                                                          | Gad2 SCN Neurons vs. HY GABA Neurons | <0.0001 |
|             |                                                      |                                                          | Gad1HY Astros vs. SCN Neurons        | <0.0001 |
|             |                                                      |                                                          | Gad1 HY Astros vs. HY GABA Neurons   | <0.0001 |

| Figure     | Statistical Test                                     | Mean difference (p-value)                                | Multiple comparisons                    | p-value |
|------------|------------------------------------------------------|----------------------------------------------------------|-----------------------------------------|---------|
|            |                                                      |                                                          | Gad1SCN Neurons vs. HY GABA Neurons     | 0.5416  |
| 4F (right) | Two-way ANOVA with Šídák's multiple comparisons test | Gene <0.0001<br>Cell type <0.0001<br>Interaction <0.0001 | Maob HY Astros vs. SCN Neurons          | <0.0001 |
|            |                                                      |                                                          | Maob HY Astros vs. HY GABA Neurons      | <0.0001 |
|            |                                                      |                                                          | Maob SCN Neurons vs. HY GABA Neurons    | <0.0001 |
|            |                                                      |                                                          | Aldh1a1 HY Astros vs. SCN Neurons       | <0.0001 |
|            |                                                      |                                                          | Aldh1a1 HY Astros vs. HY GABA Neurons   | <0.0001 |
|            |                                                      |                                                          | Aldh1a1 SCN Neurons vs. HY GABA Neurons | 0.9503  |
|            |                                                      |                                                          | Aldh1a1 HY Astros vs. SCN Neurons       | 0.6098  |
|            |                                                      |                                                          | Aldh1a1 HY Astros vs. HY GABA Neurons   | <0.0001 |
|            |                                                      |                                                          | Aldh1a1 SCN Neurons vs. HY GABA Neurons | <0.0001 |
|            |                                                      |                                                          | Aldh1a1 HY Astros vs. SCN Neurons       | 0.0046  |
|            |                                                      |                                                          | Aldh1a1 HY Astros vs. HY GABA Neurons   | <0.0001 |
|            |                                                      |                                                          | Aldh1a1 SCN Neurons vs. HY GABA Neurons | 0.9587  |
| 4H (left)  | Two-way ANOVA with Šídák's multiple comparisons test | Gene <0.0001<br>Cell type <0.0001<br>Interaction 0.6945  | Gad1                                    | <0.0001 |
|            |                                                      |                                                          | Gad2                                    | <0.0001 |
| 4H (right) | Two-way ANOVA with Šídák's multiple comparisons test | Gene <0.0001<br>Cell type <0.0001<br>Interaction 0.6945  | Maob                                    | <0.0001 |
|            |                                                      |                                                          | Aldh1a1                                 | <0.0001 |
|            |                                                      |                                                          | Sirt2                                   | <0.0001 |
| 4I         | eJTK Cycle rhythmcity test with BH correction        |                                                          | Gad1 Neurons                            | 0.148   |
|            |                                                      |                                                          | Gad2 Neurons                            | 0.0614  |
|            |                                                      |                                                          | Gad1 Astrocytes                         | 0.2281  |
|            |                                                      |                                                          | Gad2 Astrocytes                         | 0.2283  |
| 4J         | eJTK Cycle rhythmcity test with BH correction        |                                                          | Aldh1a1 Astrocytes                      | 0.0218  |
|            |                                                      |                                                          | Maob Astrocytes                         | 0.0653  |
|            |                                                      |                                                          | Aldh1a1 Neurons                         | 0.1278  |
|            |                                                      |                                                          | Maob Neurons                            | 0.1780  |
| 5C         | Two-way ANOVA with Šídák's multiple comparisons test | Time 0.0007<br>Treatment 0.0331<br>Interaction 0.3944    | Baseline                                | 0.1466  |
|            |                                                      |                                                          | Treatment                               | 0.0303  |
| 5E         | Two-way ANOVA with Šídák's multiple comparisons test | Time 0.8697<br>Treatment 0.233<br>Interaction 0.4605     | Baseline                                | 0.2928  |
|            |                                                      |                                                          | Treatment                               | 0.8636  |
| 5F         | Unpaired two-tailed t-test                           | 0.1378                                                   |                                         |         |
| 5G         |                                                      | Time 0.2401                                              | BSL DMSO vs. Sel                        | 0.6991  |

| Figure                            | Statistical Test                                                   | Mean difference (p-value)                             | Multiple comparisons              | p-value |
|-----------------------------------|--------------------------------------------------------------------|-------------------------------------------------------|-----------------------------------|---------|
|                                   | Two-way ANOVA with Šídák's multiple comparisons test               | Treatment 0.299<br>Interaction 0.7141                 | Treatment DMSO vs. Sel            | 0.4667  |
|                                   |                                                                    |                                                       | DMSO Baseline vs. Treatment       | 0.7898  |
|                                   |                                                                    |                                                       | Selegiline Baseline vs. Treatment | 0.4982  |
| 5H                                | Two-way ANOVA with Šídák's multiple comparisons test               | Time 0.8199<br>Treatment 0.1272<br>Interaction 0.0333 | BSL DMSO vs. Sel                  | 0.8506  |
| Treatment DMSO vs. Sel            |                                                                    |                                                       | 0.0176                            |         |
| DMSO Baseline vs. Treatment       |                                                                    |                                                       | 0.2603                            |         |
| Selegiline Baseline vs. Treatment |                                                                    |                                                       | 0.1846                            |         |
| 5J                                | Two-way ANOVA with Šídák's multiple comparisons test               | Time 0.3076<br>Treatment 0.2704<br>Interaction 0.774  | Baseline                          | 0.559   |
| Treatment                         |                                                                    |                                                       | 0.4258                            |         |
| 5K                                | Unpaired two-tailed t-test                                         | 0.0341                                                |                                   |         |
| 5L                                | Two-way ANOVA with Šídák's multiple comparisons test               | Time 0.6845<br>Treatment 0.1217<br>Interaction 0.0474 | BSL DMSO vs. Sel                  | 0.764   |
|                                   |                                                                    |                                                       | Treatment DMSO vs. Sel            | 0.0443  |
|                                   |                                                                    |                                                       | DMSO Baseline vs. Treatment       | 0.3304  |
|                                   |                                                                    |                                                       | Selegiline Baseline vs. Treatment | 0.19    |
| 5M                                | Two-way ANOVA with Šídák's multiple comparisons test               | Time 0.1341<br>Treatment 0.0985<br>Interaction 0.0599 | BSL DMSO vs. Sel                  | 0.9069  |
|                                   |                                                                    |                                                       | Treatment DMSO vs. Sel            | 0.0214  |
|                                   |                                                                    |                                                       | DMSO Baseline vs. Treatment       | 0.9059  |
|                                   |                                                                    |                                                       | Selegiline Baseline vs. Treatment | 0.0657  |
| 6C                                | Unpaired two-tailed t-test                                         | 0.0085                                                |                                   |         |
| 6D                                | Two-way mixed effects model with Šídák's multiple comparisons test | Time 0.028<br>Treatment 0.0072<br>Interaction 0.0034  | Treatment                         | 0.0092  |
|                                   |                                                                    |                                                       | Washout                           | 0.1104  |
| 6E                                | Two-way mixed effects model with Šídák's multiple comparisons test | Time 0.2015<br>Treatment 0.3925<br>Interaction 0.0955 | Baseline                          | 0.9376  |
|                                   |                                                                    |                                                       | Treatment                         | 0.0586  |
|                                   |                                                                    |                                                       | Washout                           | 0.9994  |
| 6F                                | Two-way mixed effects model with Šídák's multiple comparisons test | Time 0.4417<br>Treatment 0.0821<br>Interaction 0.8391 | Baseline                          | 0.2452  |
|                                   |                                                                    |                                                       | Treatment                         | 0.308   |
|                                   |                                                                    |                                                       | Washout                           | 0.2849  |
| 6H                                | Unpaired two-tailed t-test                                         | 0.4235                                                |                                   |         |
| 6I                                | Two-way mixed effects model with Šídák's multiple comparisons test | Time 0.4973<br>Treatment 0.2306<br>Interaction 0.3265 | Treatment                         | 0.1574  |
|                                   |                                                                    |                                                       | Washout                           | 0.9935  |
| 6J                                |                                                                    | Time 0.1287                                           | Baseline                          | 0.3531  |

| Figure | Statistical Test                                                   | Mean difference (p-value)                             | Multiple comparisons  | p-value |
|--------|--------------------------------------------------------------------|-------------------------------------------------------|-----------------------|---------|
|        | Two-way mixed effects model with Šídák's multiple comparisons test | Treatment 0.0556<br>Interaction 0.3454                | Treatment             | >0.9999 |
|        |                                                                    |                                                       | Washout               | 0.0364  |
| 6L     | Unpaired two-tailed t-test                                         | 0.7328                                                |                       |         |
| 6M     | Two-way mixed effects model with Šídák's multiple comparisons test | Time 0.3212<br>Treatment 0.1194<br>Interaction 0.3143 | Treatment             | 0.4575  |
|        |                                                                    |                                                       | Washout               | 0.0591  |
| 6N     | Two-way mixed effects model with Šídák's multiple comparisons test | Time 0.3719<br>Treatment 0.058<br>Interaction 0.6464  | Baseline              | 0.2156  |
|        |                                                                    |                                                       | Treatment             | 0.6916  |
|        |                                                                    |                                                       | Washout               | 0.6482  |
| 7B     | Two-way ANOVA with Šídák's multiple comparisons test               | Time 0.0106<br>Treatment 0.3371<br>Interaction 0.132  | BSL DMSO vs A37       | 0.8237  |
|        |                                                                    |                                                       | Day 1-3 DMSO vs A37   | 0.3231  |
|        |                                                                    |                                                       | DMSO BSL vs Day 1-3   | 0.5389  |
|        |                                                                    |                                                       | A37 BSL vs Day 1-3    | 0.0085  |
| 7D     | Two-way ANOVA with Šídák's multiple comparisons test               | Time 0.3132<br>Treatment 0.6054<br>Interaction 0.3885 | BSL DMSO vs A37       | 0.6049  |
|        |                                                                    |                                                       | Day 1-3 DMSO vs A37   | 0.9998  |
| 7E     | Nested two-tailed t-test                                           | 0.0807                                                |                       |         |
| 7F     | Kolmogorov-Smirnov test                                            |                                                       | DMSO BSL vs treatment | <0.0001 |
|        |                                                                    |                                                       | A37 BSL vs treatment  | <0.0001 |
| 7G     | Kolmogorov-Smirnov test                                            |                                                       | DMSO vs A37 treatment | <0.0001 |
| 7I     | Two-way ANOVA with Šídák's multiple comparisons test               | Time 0.0003<br>Treatment 0.0018<br>Interaction 0.0011 | BSL DMSO vs A37       | 0.8555  |
|        |                                                                    |                                                       | Day 1-3 DMSO vs A37   | <0.0001 |
|        |                                                                    |                                                       | DMSO BSL vs Day 1-3   | 0.7898  |
|        |                                                                    |                                                       | A37 BSL vs Day 1-3    | <0.0001 |
| 7K     | Two-way ANOVA with Šídák's multiple comparisons test               | Time 0.1389<br>Treatment 0.6074<br>Interaction 0.6043 | BSL DMSO vs A37       | 0.9124  |
|        |                                                                    |                                                       | Day 1-3 DMSO vs A37   | 0.7743  |
| 7L     | Nested two-tailed t-test                                           | 0.5504                                                |                       |         |
| 7F     | Kolmogorov-Smirnov test                                            |                                                       | DMSO BSL vs treatment | 0.102   |
|        |                                                                    |                                                       | A37 BSL vs treatment  | <0.0001 |
| 7G     | Kolmogorov-Smirnov test                                            |                                                       | DMSO vs A37 treatment | <0.0001 |
| EV1C   | Two-way ANOVA with Šídák's multiple comparisons test               | Region 0.3376                                         | NucBlue D vs. V       | 0.8751  |
|        |                                                                    |                                                       | D vs. M               | >0.9999 |



| Figure        | Statistical Test                                     | Mean difference (p-value)                                       | Multiple comparisons                        | p-value           |
|---------------|------------------------------------------------------|-----------------------------------------------------------------|---------------------------------------------|-------------------|
|               | e comparisons test                                   | Reporter<br>0.0194<br>Interaction<br>0.9409                     | D vs. L                                     | 0.9787            |
|               |                                                      |                                                                 | V vs. M                                     | 0.989             |
|               |                                                      |                                                                 | V vs. L                                     | >0.9999           |
|               |                                                      |                                                                 | M vs. L                                     | 0.9965            |
|               |                                                      |                                                                 | Syn-jRCaMP1a                                |                   |
|               |                                                      |                                                                 | D vs. V                                     | 0.9924            |
|               |                                                      |                                                                 | D vs. M                                     | 0.9674            |
|               |                                                      |                                                                 | D vs. L                                     | 0.9798            |
|               |                                                      |                                                                 | V vs. M                                     | 0.9997            |
|               |                                                      |                                                                 | V vs. L                                     | 0.9989            |
|               |                                                      |                                                                 | M vs. L                                     | >0.9999           |
|               |                                                      |                                                                 | GfaABC1D-Ick-GCaMP6f                        |                   |
|               |                                                      |                                                                 | D vs. V                                     | 0.9926            |
|               |                                                      |                                                                 | D vs. M                                     | 0.9444            |
|               |                                                      |                                                                 | D vs. L                                     | 0.9581            |
|               |                                                      |                                                                 | V vs. M                                     | >0.9999           |
|               |                                                      |                                                                 | V vs. L                                     | 0.9992            |
|               |                                                      |                                                                 | M vs. L                                     | 0.9306            |
|               |                                                      |                                                                 | GFAP                                        |                   |
|               |                                                      |                                                                 | D vs. V                                     | 0.9663            |
| D vs. M       | 0.999                                                |                                                                 |                                             |                   |
| D vs. L       | 0.9976                                               |                                                                 |                                             |                   |
| V vs. M       | 0.8979                                               |                                                                 |                                             |                   |
| V vs. L       | 0.935                                                |                                                                 |                                             |                   |
| M vs. L       | >0.9999                                              |                                                                 |                                             |                   |
| EV1E (top)    | Two-way ANOVA with Šídák's multiple comparisons test | Region<br>0.9797<br>Reporter<br>0.0387<br>Interaction<br>0.9502 | Syn-jRCaMP1a<br>Anterior vs. Medial         | >0.9999           |
|               |                                                      |                                                                 | Anterior vs. Posterior                      | 0.9822            |
|               |                                                      |                                                                 | Medial vs. Posterior                        | 0.9831            |
|               |                                                      |                                                                 | gfaABC1D-Ick-GCaMP6f<br>Anterior vs. Medial | 0.9997            |
|               |                                                      |                                                                 | Anterior vs. Posterior                      | 0.9993            |
|               |                                                      |                                                                 | Medial vs. Posterior                        | >0.9999           |
| EV1E (bottom) | Watson-Williams test                                 | 0.341077                                                        |                                             |                   |
| EV1F (top)    | Two-way ANOVA with Šídák's multiple comparisons test | Region<br>0.3723<br>Reporter<br>0.0458<br>Interaction<br>0.2417 | Syn-jRCaMP1a                                | 0.2541            |
|               |                                                      |                                                                 | gfaABC1D-iGluSnFR                           | 0.9724            |
| EV1F (bottom) | Watson-Williams test                                 | 0.067746                                                        |                                             |                   |
| EV1G (top)    | Two-way ANOVA with Šídák's multiple comparisons test | Region<br>0.8078<br>Reporter<br>0.0111<br>Interaction<br>0.8055 | Syn-jRCaMP1a<br>Anterior vs. Medial         | >0.9999<br>0.8471 |
|               |                                                      |                                                                 | Anterior vs. Posterior                      | 0.783             |
|               |                                                      |                                                                 | Medial vs. Posterior                        | >0.9999           |
|               |                                                      |                                                                 | gfaABC1D-Ick-GCaMP6f<br>Anterior vs. Medial | 0.9983            |
|               |                                                      |                                                                 | Anterior vs. Posterior                      | 0.9984            |
|               |                                                      |                                                                 | Medial vs. Posterior                        | >0.9999           |
| EV1G (bottom) | Watson-Williams test                                 | 0.628638                                                        |                                             |                   |
| EV2D          | Paired two-tailed t-test                             | 0.0013                                                          |                                             |                   |

| Figure | Statistical Test                                                   | Mean difference (p-value)                                 | Multiple comparisons         | p-value |
|--------|--------------------------------------------------------------------|-----------------------------------------------------------|------------------------------|---------|
| EV2E   | Kolmogorov-Smirnov test                                            | 0.00397                                                   |                              |         |
| EV2G   | Paired two-tailed t-test                                           | 0.0076                                                    |                              |         |
| EV3H   | Two-way ANOVA with Šídák's multiple comparisons test               | Gene <0.0001<br>Cell type <0.0001<br>Interaction <0.0001  | Slc6a11 (GAT3)               | <0.0001 |
|        |                                                                    |                                                           | Slc6a1 (GAT1)                | <0.0001 |
|        |                                                                    |                                                           | Best1                        | <0.0001 |
| EV3I   | Two-way ANOVA with Šídák's multiple comparisons test               | Gene <0.0001<br>Cell type <0.0001<br>Interaction <0.0001  | Slc6a11 (GAT3)               | <0.0001 |
|        |                                                                    |                                                           | Slc6a1 (GAT1)                | <0.0001 |
|        |                                                                    |                                                           | Best1                        | 0.0038  |
| EV3J   | eJTK Cycle rhythmicity test with BH correction                     |                                                           | Slc6a11 Neurons              | 0.28569 |
|        |                                                                    |                                                           | Slc6a11 Astrocytes           | 0.00444 |
| EV4B   | Two-way ANOVA with Šídák's multiple comparisons test               | Reporter 0.0008<br>Treatment 0.0687<br>Interaction 0.0193 | GFAP                         | 0.2889  |
|        |                                                                    |                                                           | Gfap-mCherry-Cre             | 0.9979  |
|        |                                                                    |                                                           | GABA                         | 0.0053  |
| EV4C   | Unpaired two-tailed t-test                                         | 0.3505                                                    |                              |         |
| EV4E   | Two-way ANOVA with Šídák's multiple comparisons test               | Time 0.7159<br>Treatment 0.38<br>Interaction 0.7248       | BSL DMSO vs Selegiline       | 0.5616  |
|        |                                                                    |                                                           | Treatment DMSO vs Selegiline | 0.7954  |
|        |                                                                    |                                                           | DMSO BSL vs Treatment        | 0.8347  |
|        |                                                                    |                                                           | Selegiline BSL vs Treatment  | >0.9999 |
| EV4F   | Unpaired two-tailed t-test                                         | 0.0947                                                    |                              |         |
| EV4G   | Two-way ANOVA with Šídák's multiple comparisons test               | Time 0.1699<br>Treatment 0.8814<br>Interaction 0.6577     | BSL DMSO vs Selegiline       | 0.8955  |
|        |                                                                    |                                                           | Treatment DMSO vs Selegiline | 0.9765  |
|        |                                                                    |                                                           | DMSO BSL vs Treatment        | 0.3255  |
|        |                                                                    |                                                           | Selegiline BSL vs Treatment  | 0.7471  |
| EV4H   | Two-way ANOVA with Šídák's multiple comparisons test               | Time 0.0352<br>Treatment 0.4783<br>Interaction 0.3145     | BSL DMSO vs Selegiline       | 0.4616  |
|        |                                                                    |                                                           | Treatment DMSO vs Selegiline | 0.9808  |
|        |                                                                    |                                                           | DMSO BSL vs Treatment        | 0.498   |
|        |                                                                    |                                                           | Selegiline BSL vs Treatment  | 0.0834  |
| EV5B   | One-way ANOVA with Šídák's multiple comparisons test               | 0.0180                                                    | DMSO vs. 10µM                | 0.4455  |
|        |                                                                    |                                                           | DMSO vs. 25µM                | 0.0161  |
|        |                                                                    |                                                           | DMSO vs. 50µM                | 0.0233  |
| EV5C   | Two-way mixed effects model with Šídák's multiple comparisons test | Time 0.009<br>Treatment 0.0065<br>Interaction 0.1432      | Treatment DMSO vs 10uM       | 0.8599  |
|        |                                                                    |                                                           | DMSO vs 25uM                 | 0.0206  |
|        |                                                                    |                                                           | DMSO vs 50uM                 | 0.0052  |
|        |                                                                    |                                                           | 10uM vs 25uM                 | 0.4209  |
|        |                                                                    |                                                           | 10uM vs 50uM                 | 0.1023  |

| Figure                                  | Statistical Test                                     | Mean difference (p-value)                             | Multiple comparisons                    | p-value |
|-----------------------------------------|------------------------------------------------------|-------------------------------------------------------|-----------------------------------------|---------|
|                                         |                                                      |                                                       | 25uM vs 50uM                            | 0.8308  |
|                                         |                                                      |                                                       | Washout                                 |         |
|                                         |                                                      |                                                       | DMSO vs 10uM                            | 0.958   |
|                                         |                                                      |                                                       | DMSO vs 25uM                            | 0.9943  |
|                                         |                                                      |                                                       | DMSO vs 50uM                            | 0.055   |
|                                         |                                                      |                                                       | 10uM vs 25uM                            | 0.5053  |
|                                         |                                                      |                                                       | 10uM vs 50uM                            | 0.004   |
|                                         |                                                      |                                                       | 25uM vs 50uM                            | 0.0477  |
|                                         |                                                      |                                                       | Syn-GABASnFR DMSO Treatment vs. Washout | 0.9791  |
|                                         |                                                      |                                                       | Syn-GABASnFR 10uM Treatment vs. Washout | 0.0214  |
|                                         |                                                      |                                                       | Syn-GABASnFR 25uM Treatment vs. Washout | 0.0022  |
| Syn-GABASnFR 50uM Treatment vs. Washout | 0.4788                                               |                                                       |                                         |         |
| S1G                                     | Paired two-tailed t-test                             | 0.0583                                                |                                         |         |
| S2A                                     | Two-way ANOVA with Šídák's multiple comparisons test | Time 0.6352<br>Treatment 0.3814<br>Interaction 0.5059 | Baseline                                | 0.9997  |
|                                         |                                                      |                                                       | Day 1-6                                 | 0.5169  |
|                                         |                                                      |                                                       | >7d after                               | 0.8356  |
| S2B                                     | Two-way ANOVA with Šídák's multiple comparisons test | Time 0.0708<br>Treatment 0.4385<br>Interaction 0.187  | Baseline                                | >0.9999 |
|                                         |                                                      |                                                       | Day 1-6                                 | 0.974   |
|                                         |                                                      |                                                       | >7d after                               | 0.0668  |
